# Supplementary material for: MoS2-catalyzed selective electrocatalytic hydrogenation of aromatic aldehydes in an aqueous environment
Source: Royal Society of Chemistry journal article supplement (doi:10.1039/d2gc02166h), 2022-01-01
Supplement: d2gc02166h1.pdf [file d2gc02166h1.pdf]

Supporting information

## **MoS<sub>2</sub>-Catalyzed Selective Electrocatalytic Hydrogenation of Aromatic Aldehydes in an Aqueous Environment**

Shuquan Huang<sup>1</sup>, Yangxin Jin<sup>1</sup>, Man Zhang<sup>3</sup>, Kai Yan<sup>3</sup>, Shien-Ping Feng<sup>4</sup>,  
Jason Chun-Ho Lam<sup>1,2\*</sup>

<sup>1</sup>School of Energy and Environment, City University of Hong Kong, Kowloon Tong, Hong Kong SAR.

<sup>2</sup>State Key Laboratory of Marine Pollution, City University of Hong Kong, Kowloon Tong, Hong Kong SAR.

<sup>3</sup>School of Environmental Science and Engineering, Sun Yat-sen University, Guangzhou 510275, China

<sup>4</sup>Department of Advanced Design and Systems Engineering, City University of Hong Kong, Kowloon, Hong Kong, SAR.

\*Corresponding Author: [jason.lam@cityu.edu.hk](mailto:jason.lam@cityu.edu.hk)

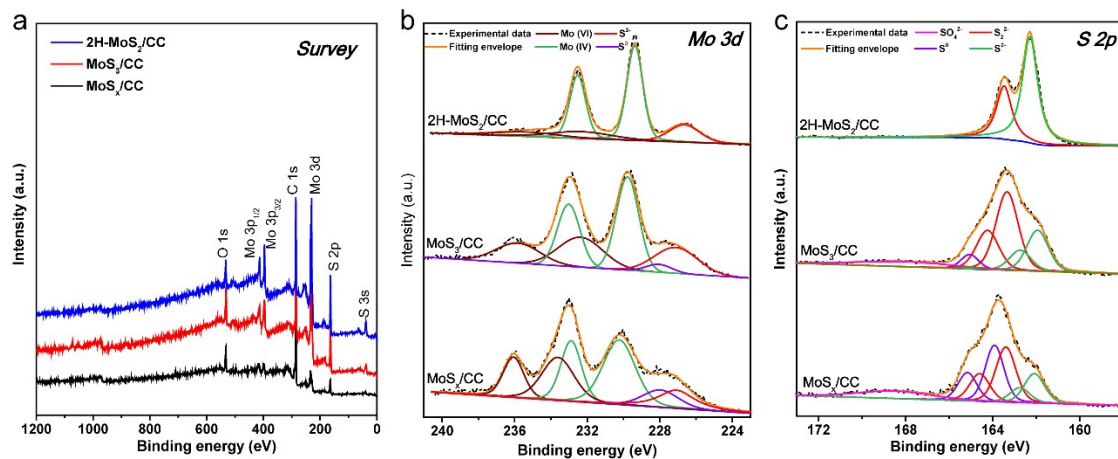

**Figure S1** XPS data of the molybdenum sulfide seed layer obtained at different temperature.

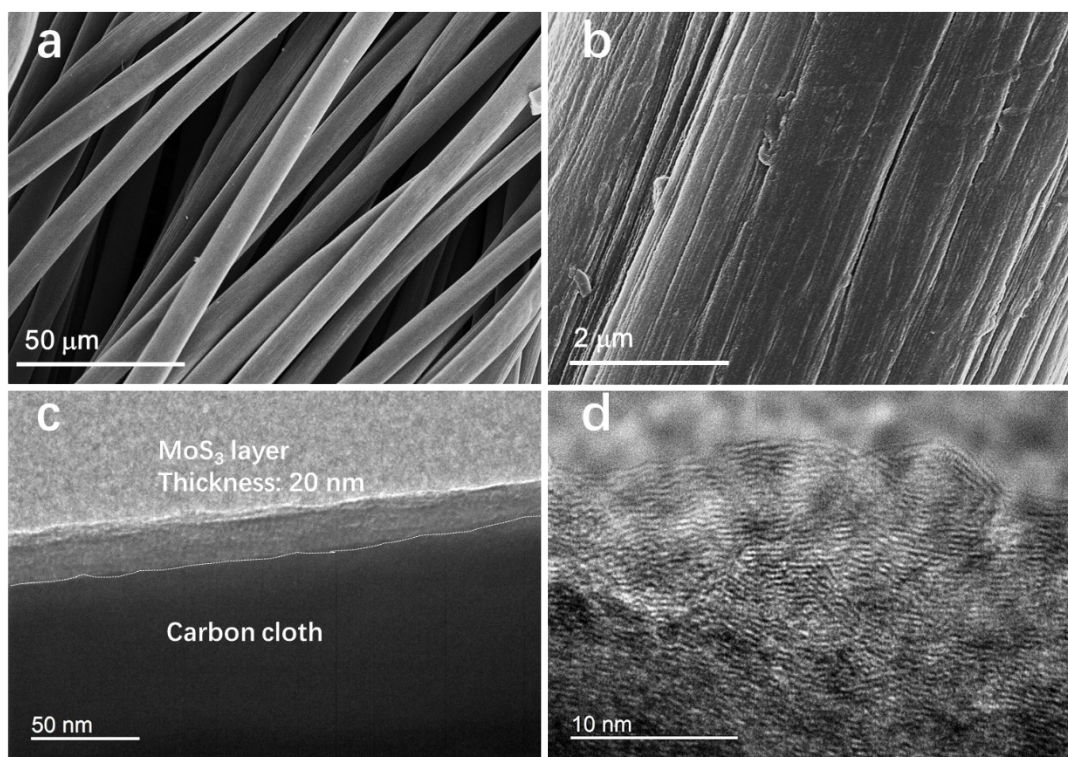

**Figure S2** Surface characterization of the MoS<sub>3</sub>/CC; (a) low magnification SEM image; (b) high magnification SEM image; (c) TEM and d) HRTEM.

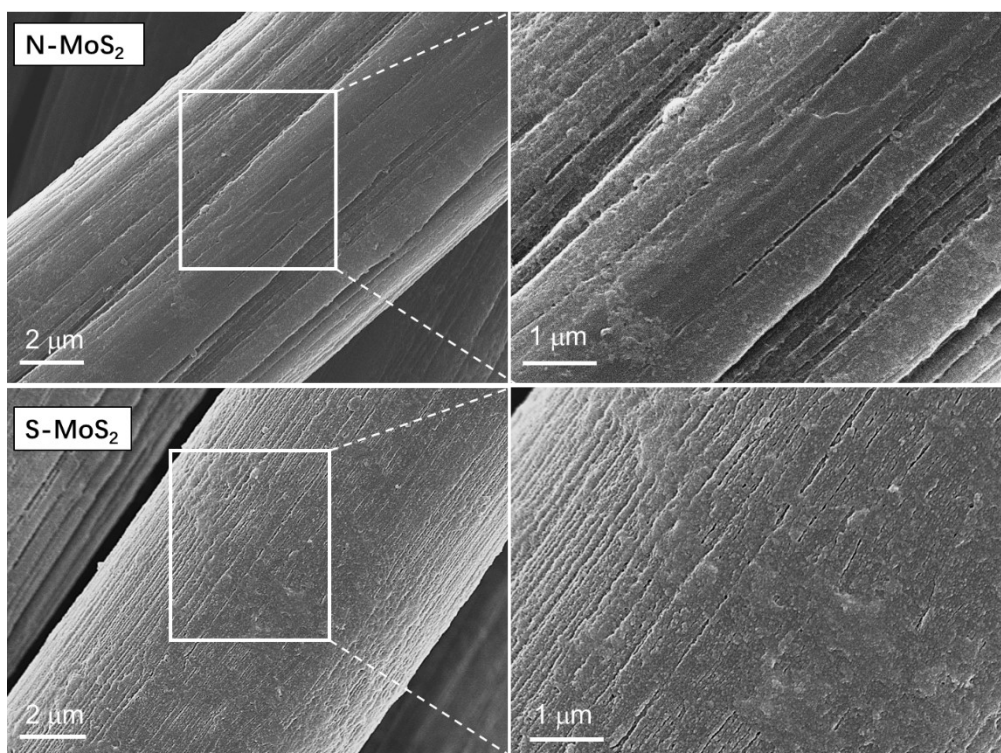

**Figure S3** SEM images of the N-MoS<sub>2</sub> and S-MoS<sub>2</sub> electrode

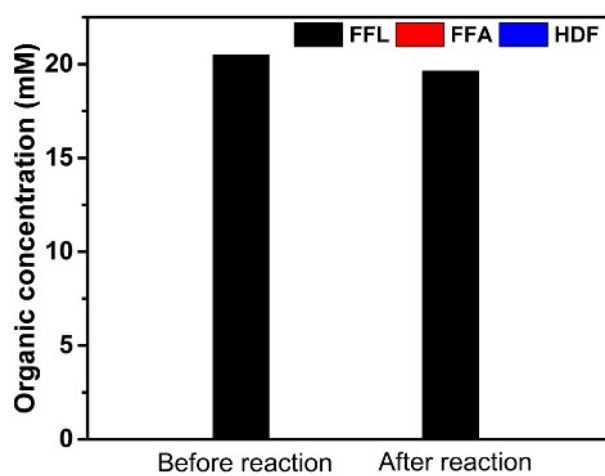

**Figure S4** Open-circuit control experiment performed by bubbling H<sub>2</sub> into the electrolyte with FFL for 2h

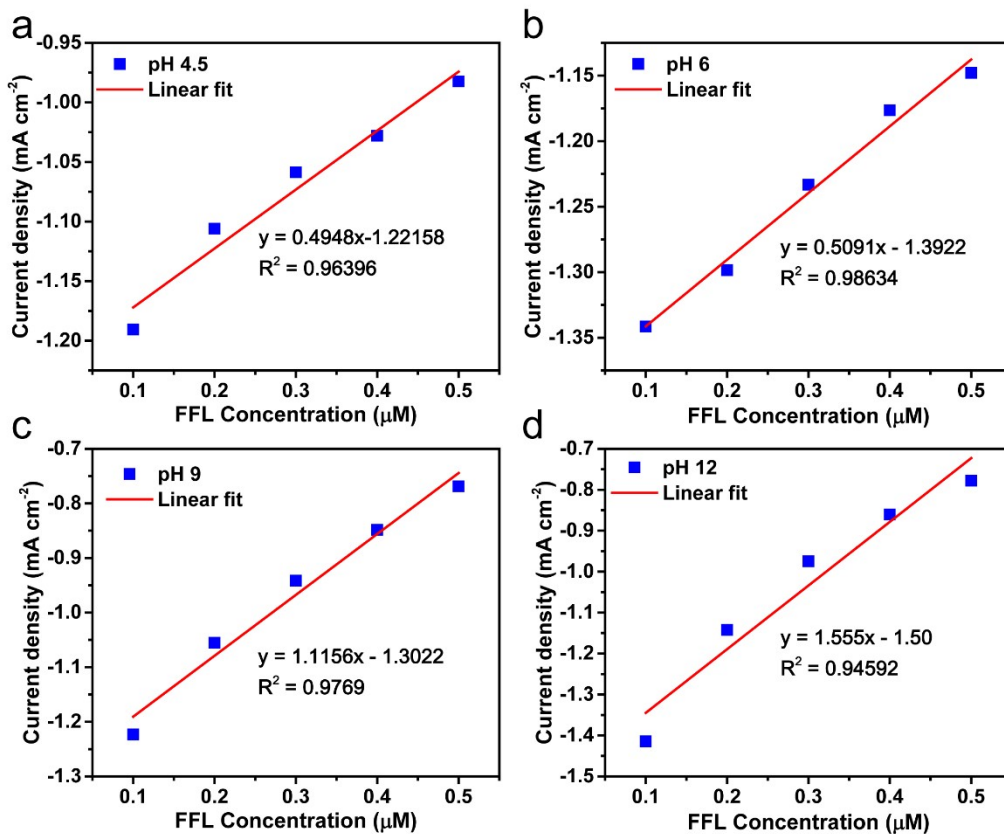

**Figure S5** Fitting line shows the decrease in  $H_{\text{UPD}}$  current in the first five concentrations (0.1, 0.2, 0.3, 0.4 and 0.5  $\mu\text{M}$ ) over the S-MoS<sub>2</sub> electrodes at (a) pH 4.5, (b) pH 6, (c) 9, and (d) 12 at room temperature.

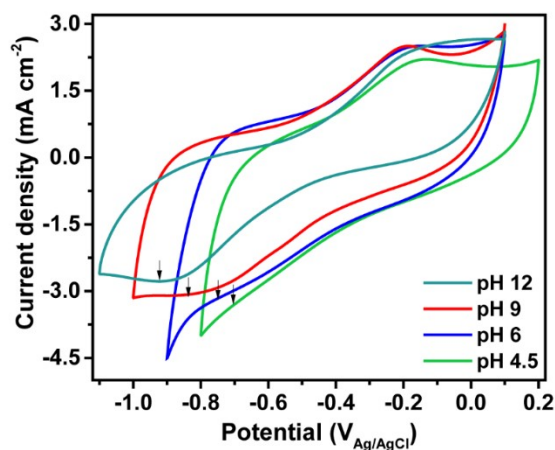

**Figure S6** Cyclic voltammogram measurements on the S-MoS<sub>2</sub> electrode in the hydrogen underpotential deposition potential ( $H_{\text{UPD}}$ ) range without adding FFL at 50  $\text{mV/s}$ , pH 9 buffer at room temperature.

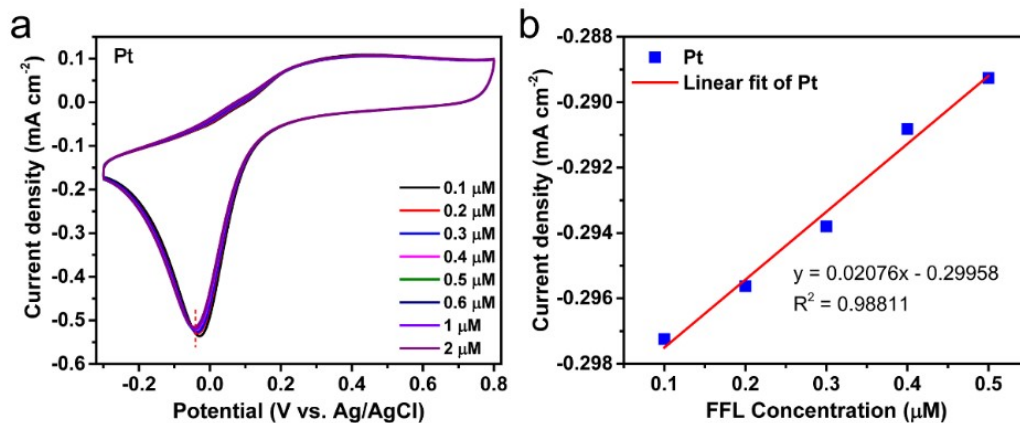

**Figure S7** a) H<sub>UPD</sub> experiment conducted on the Pt electrode at pH 9 electrolyte. The H<sub>UPD</sub> potentials were marked with a red dotted line on the voltammograms; b) Fitting line shows the decrease in H<sub>UPD</sub> current in the first five concentrations (0.1, 0.2, 0.3, 0.4 and 0.5 μM) over the Pt electrodes

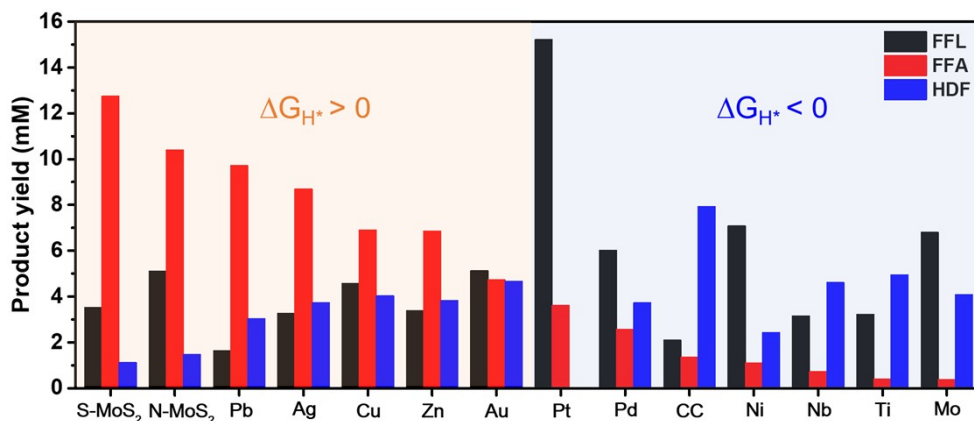

**Figure S8** ECH study of furfural using different common ECH metals electrodes. All electrodes were evaluated from a bulk electrolysis of reaction of 20 mM furfural in 4:1 (v. /v.) pH 9 buffer: ACN at  $j = 10 \text{ mA cm}^{-2}$  at room temperature. The plus or minus sign of  $\Delta G_{H^*}$  of the electrodes are referring to the hydrogen volcano plot reported by Paola et al.<sup>1</sup>

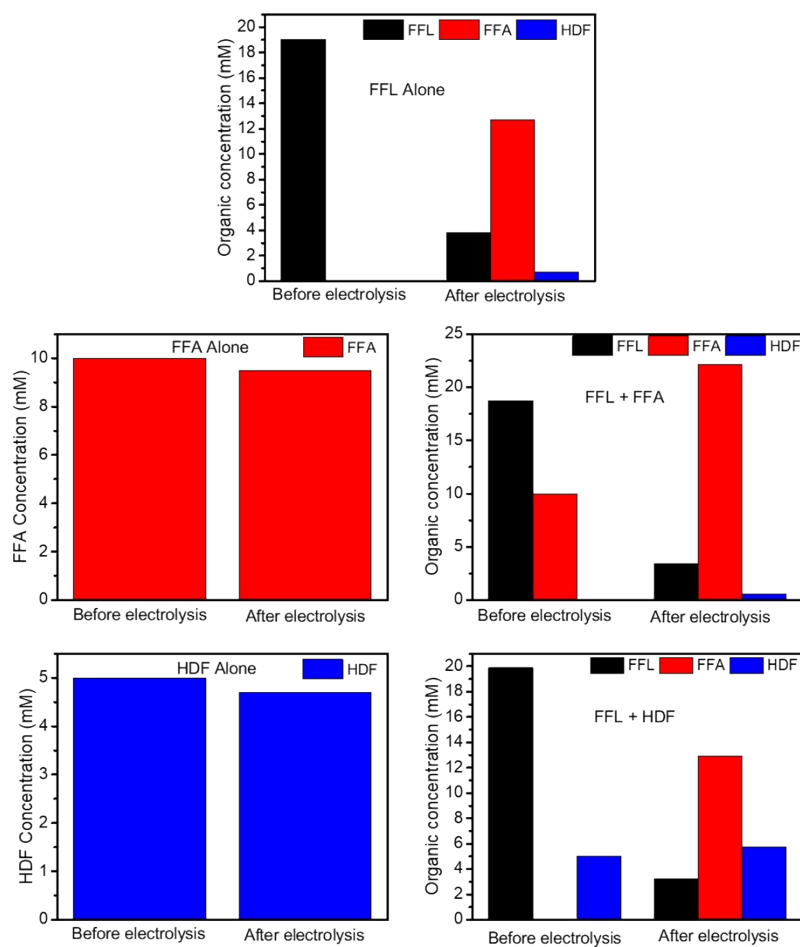

**Figure S9** Control experiments on the electrolysis of reactant and products.

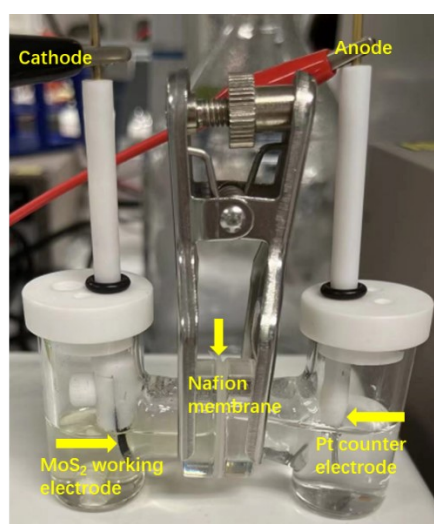

**Figure S10** Electrochemical reaction setup

## Appendix: GC-MS and HPLC results for organic substrates electrolysis

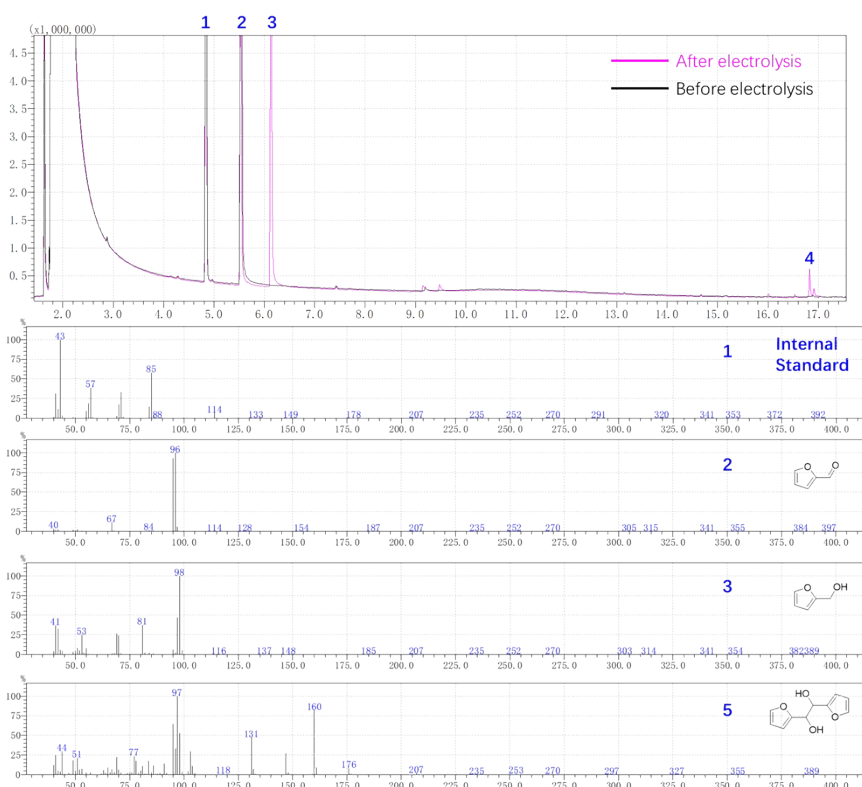

Figure S11 Represents GC-MS spectra for ECH of furfural at pH 9.

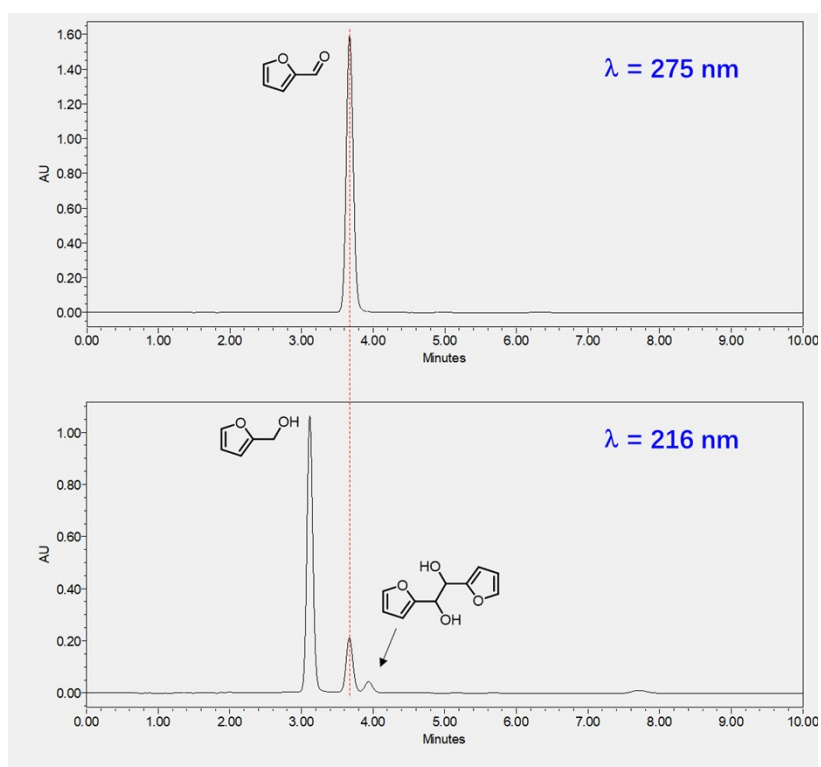

Figure S12 Representative HPLC spectra of ECH of furfural at pH 9. Detect wavelength:  $\lambda = 216$  nm.

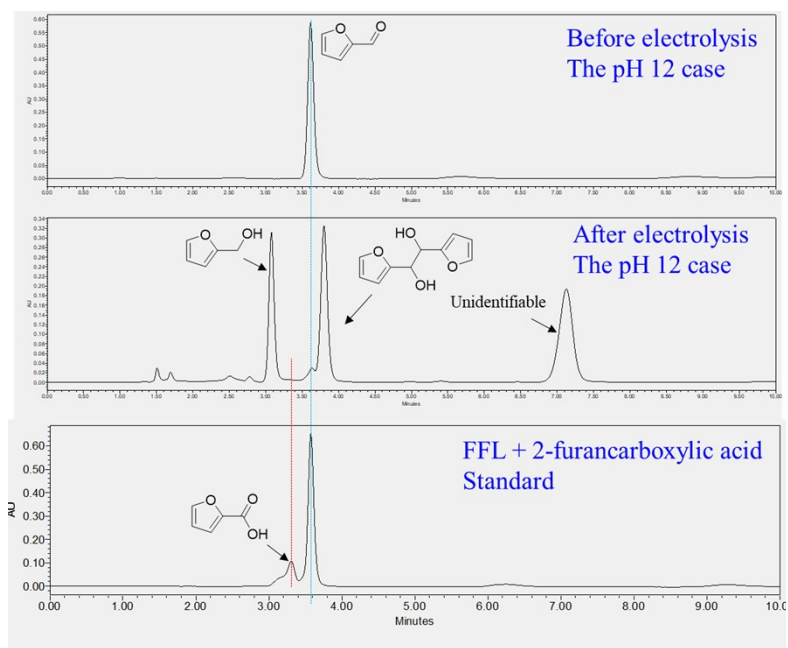

**Figure S13** Representative HPLC spectra of ECH of furfural at pH 12. Detect wavelength:  $\lambda = 216$  nm

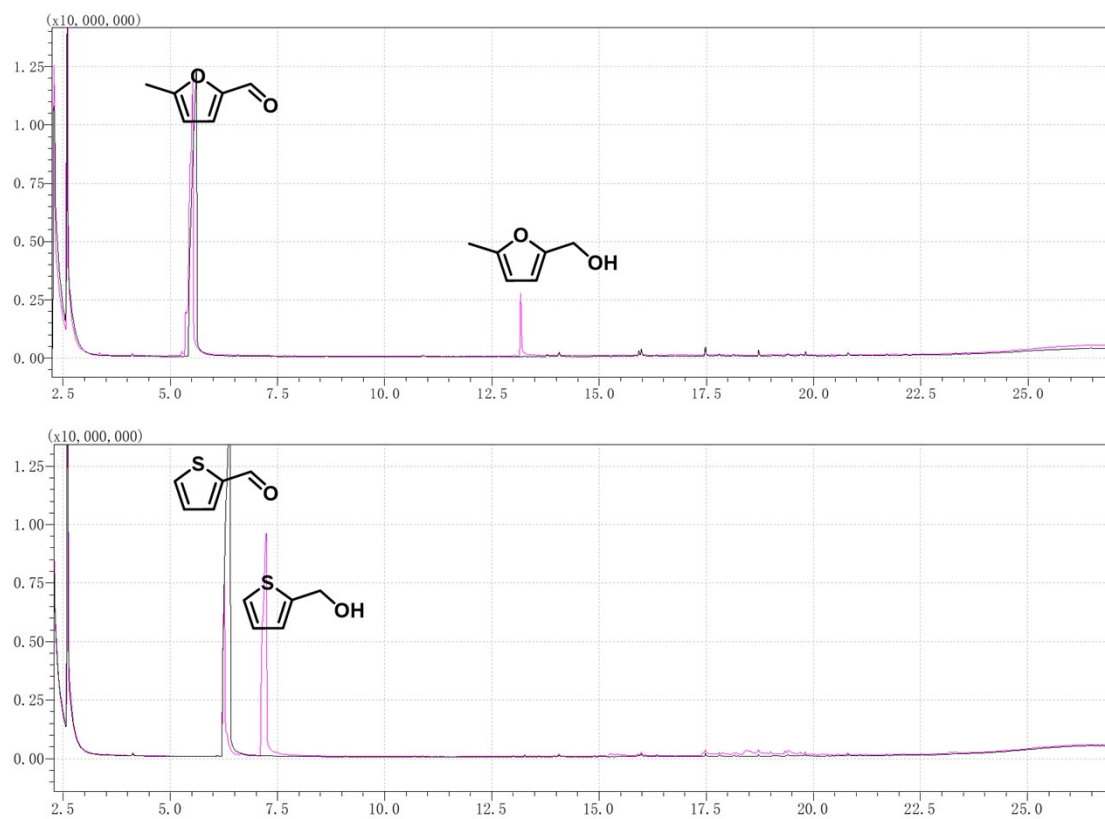



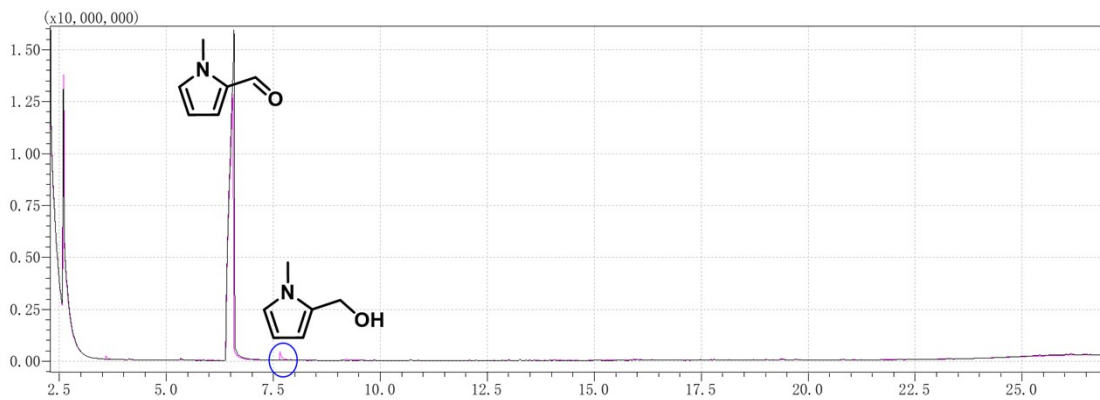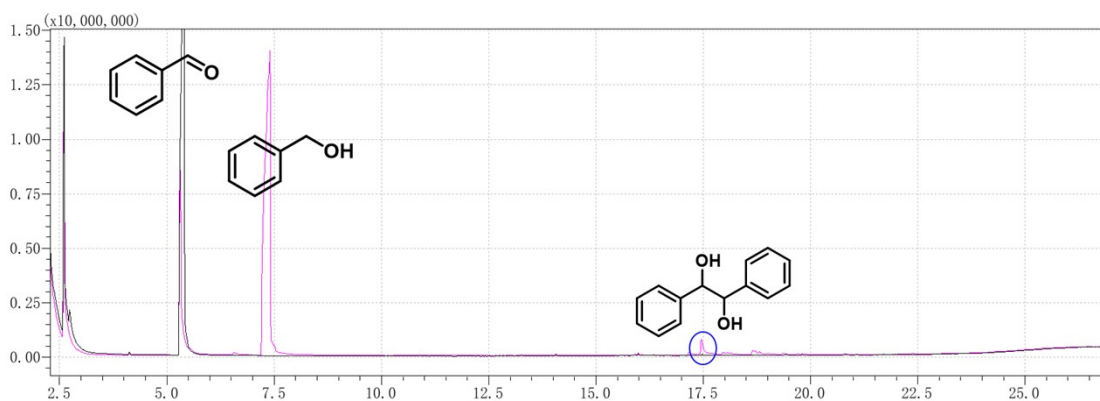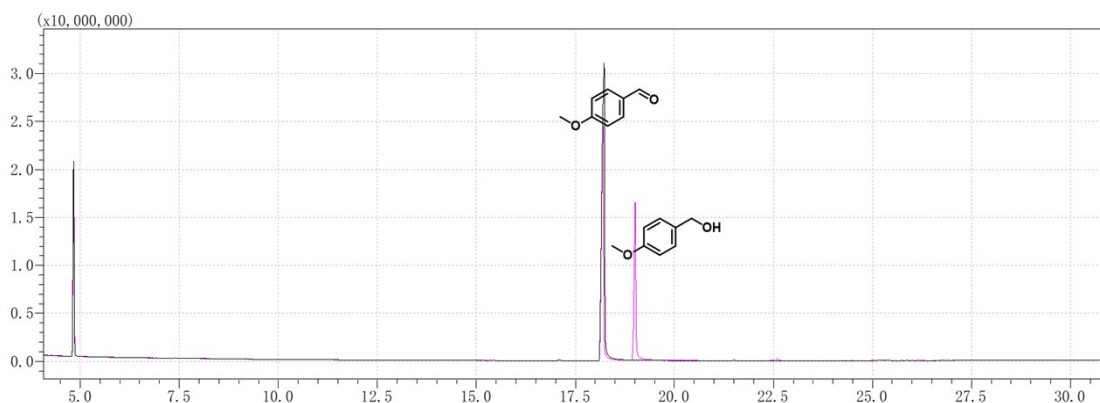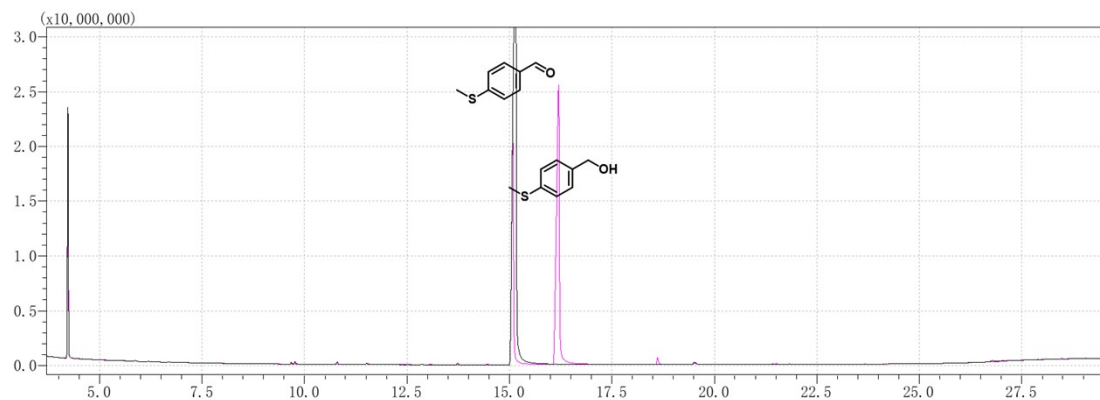

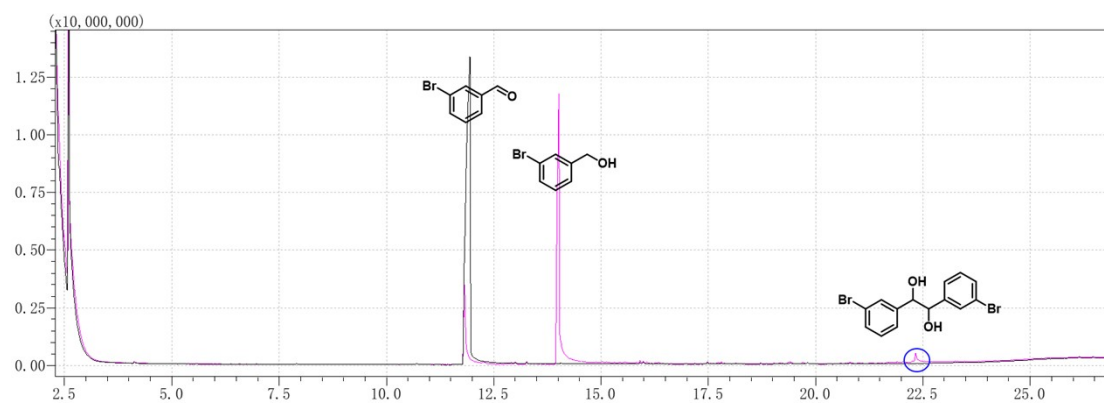

**Figure S14** Representative GC-MS results for selected substrates. Before electrolysis (black line); and after electrolysis (magenta line)

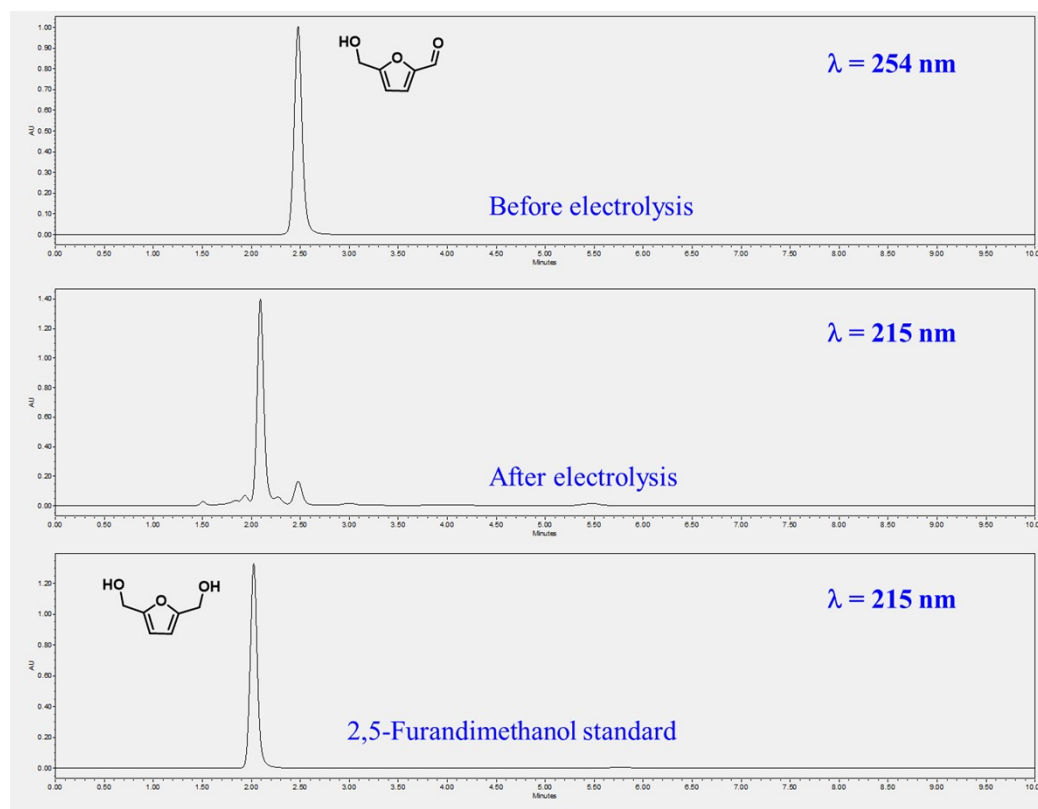

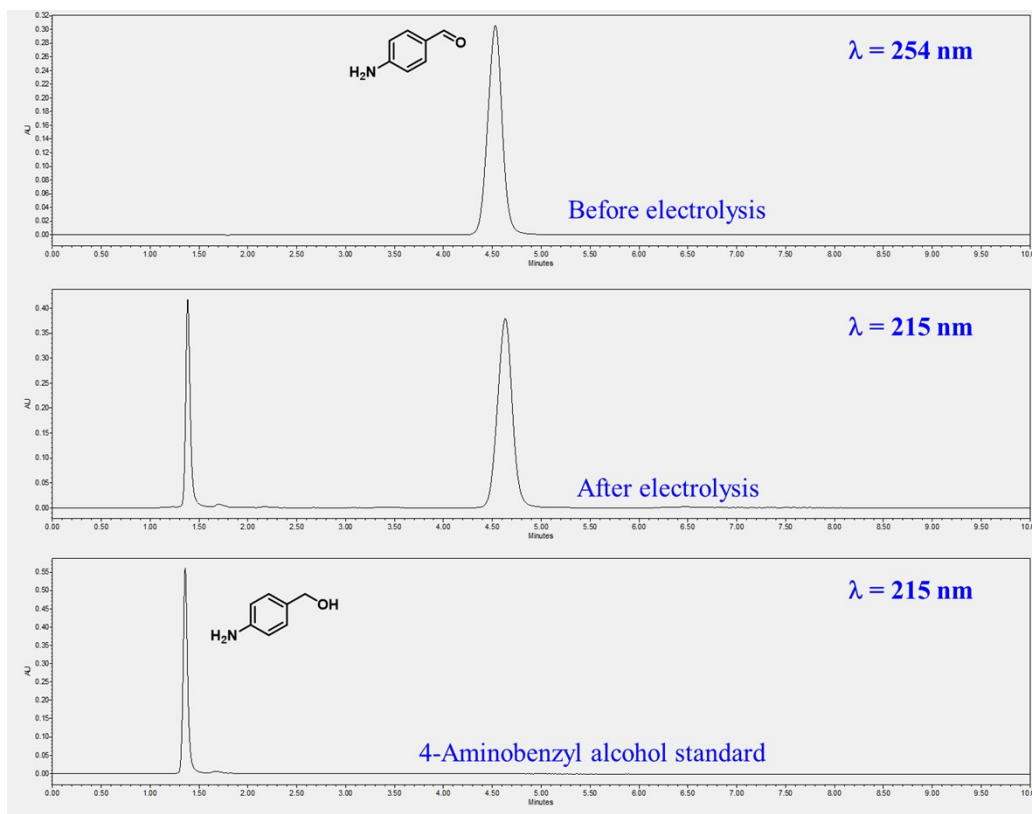

**Figure S15** Representative HPLC spectra for selected substrates

**Table S1** Surface elemental composition analysis of the molybdenum sulfide seed layer by XPS

| Sample ID               | Mo (at%) | S (at%) | O (at%) | C (at%) | Mo:S  |
|-------------------------|----------|---------|---------|---------|-------|
| MoS <sub>x</sub> /CC    | 3.58     | 15.17   | 16.63   | 47.8    | 1:4.2 |
| MoS <sub>3</sub> /CC    | 5.82     | 15.82   | 13.59   | 47.53   | 1:2.7 |
| 2H-MoS <sub>2</sub> /CC | 9.79     | 19.81   | 9.73    | 47.7    | 1:2.0 |

**Table S2** Relative atomic percentage (at.%) of different Mo 3d species calculated from the high-resolution XPS spectra of Mo 3d of the N-MoS<sub>2</sub> and S-MoS<sub>2</sub> electrode.

| Sample ID          | Mo <sup>4+</sup> 3d <sub>5/2</sub> |        |           |        | Mo <sup>4+</sup> 3d <sub>3/2</sub> |        |           |        | Mo <sup>6+</sup> 3d <sub>5/2</sub> |        | Mo <sup>6+</sup> 3d <sub>5/2</sub> |        | 1T : 2H : MoOx |
|--------------------|------------------------------------|--------|-----------|--------|------------------------------------|--------|-----------|--------|------------------------------------|--------|------------------------------------|--------|----------------|
|                    | 1T                                 |        | 2H        |        | 1T                                 |        | 2H        |        | B.E. (eV)                          | at%    | B.E. (eV)                          | at%    |                |
|                    | B.E. (eV)                          | at%    | B.E. (eV) | at%    | B.E. (eV)                          | at%    | B.E. (eV) | at%    |                                    |        |                                    |        |                |
| N-MoS <sub>2</sub> | 229.1                              | 0.2584 | 229.9     | 0.2796 | 232.2                              | 0.1722 | 233.5     | 0.1864 | 233.0                              | 0.0619 | 236.2                              | 0.0412 | 43 : 46 : 11   |
| S-MoS <sub>2</sub> | 228.9                              | 0.2691 | 229.7     | 0.2845 | 232.1                              | 0.1794 | 233.3     | 0.1896 | 232.9                              | 0.046  | 236.1                              | 0.0308 | 44 : 47 : 7    |

**Table S3** Relative atomic percentage (at.%) of different S 2p species calculated from the high-resolution XPS spectra of S 2p of the N-MoS<sub>2</sub> and S-MoS<sub>2</sub> electrode.

| Sample ID          | S 2p <sub>3/2</sub> |        |           |        | S 2p <sub>1/2</sub> |        |           |        | 1T : 2H     |
|--------------------|---------------------|--------|-----------|--------|---------------------|--------|-----------|--------|-------------|
|                    | 1T                  |        | 2H        |        | 1T                  |        | 2H        |        |             |
|                    | B.E. (eV)           | at%    | B.E. (eV) | at%    | B.E. (eV)           | at%    | B.E. (eV) | at%    |             |
| N-MoS <sub>2</sub> | 162.0               | 0.2753 | 162.6     | 0.3074 | 163.4               | 0.2302 | 164.5     | 0.1869 | 50.5 : 49.4 |
| S-MoS <sub>2</sub> | 161.9               | 0.4003 | 162.9     | 0.2663 | 163.3               | 0.2001 | 164.5     | 0.1331 | 60.0 : 39.9 |

**Table S4** Working voltage records during the electrolysis at various current densities.

| Electrode          | Current density (mA cm <sup>-2</sup> ) | Working potential (V <sub>Ag/AgCl</sub> ) |      |
|--------------------|----------------------------------------|-------------------------------------------|------|
|                    |                                        | Start                                     | End  |
| S-MoS <sub>2</sub> | 5                                      | 1.12                                      | 1.30 |
|                    | 10                                     | 1.31                                      | 1.37 |
|                    | 15                                     | 1.40                                      | 1.48 |
|                    | 20                                     | 1.47                                      | 1.53 |

**Table S5** FFL convert, Selectivity, Product yield, and Faradaic efficiency for the as-prepared S-MoS<sub>2</sub> electrode in different pH conditions.

| pH  | FFL Conv. (%) | F.E. (%) | Yield (%) |      | Sel. (%) |      |
|-----|---------------|----------|-----------|------|----------|------|
|     |               |          | FFA       | HDF  | FFA      | HDF  |
| 4.5 | 37.7          | 10.2     | 29.9      | 0.7  | 97.5     | 2.4  |
| 6   | 45.2          | 12.5     | 37.3      | 1.0  | 97.3     | 2.6  |
| 9   | 82.3          | 23.5     | 64.5      | 6.1  | 91.3     | 8.6  |
| 12  | 92.3          | 18.6     | 29.9      | 25.9 | 53.5     | 46.4 |

**Table S6** FFL convert, Selectivity, Product yield, and Faradaic efficiency for the as-prepared S-MoS<sub>2</sub> electrode under different current densities.

| Current density (mA cm <sup>-2</sup> ) | FFL Conv. (%) | F.E. (%) | Yield (%) |      | Sel. (%) |      |
|----------------------------------------|---------------|----------|-----------|------|----------|------|
|                                        |               |          | FFA       | HDF  | FFA      | HDF  |
| 5                                      | 47.7          | 29.6     | 37.2      | 2.1  | 94.7     | 5.2  |
| 10                                     | 82.3          | 26.4     | 64.5      | 6.1  | 91.3     | 8.7  |
| 15                                     | 73.6          | 13.2     | 41.0      | 12.8 | 76.2     | 23.8 |
| 20                                     | 65.6          | 8.9      | 29.7      | 14.1 | 67.8     | 32.2 |

**Table S7** FFL convert and Product yield for these base metal electrodes.

| Electrode          | FFL Conv. (%) | Yield (%) |      |
|--------------------|---------------|-----------|------|
|                    |               | FFA       | HDF  |
| S-MoS <sub>2</sub> | 81.1          | 67.1      | 5.9  |
| N-MoS <sub>2</sub> | 72.5          | 54.7      | 7.8  |
| Pb                 | 91.1          | 51.2      | 15.9 |
| Ag                 | 82.4          | 45.7      | 19.7 |
| Cu                 | 75.4          | 36.3      | 21.2 |
| Zn                 | 81.8          | 36.1      | 20.2 |
| Au                 | 72.4          | 24.9      | 24.5 |
| Pt                 | 18.2          | 19.1      | --   |
| Pd                 | 67.7          | 13.5      | 19.6 |
| CC                 | 88.7          | 7.2       | 41.7 |
| Ni                 | 61.9          | 5.7       | 12.8 |
| Nb                 | 83.1          | 3.8       | 24.3 |
| Ti                 | 82.7          | 2.1       | 26.1 |
| Mo                 | 63.4          | 2.0       | 21.4 |

## Reference

1. Quaino, P.; Juarez, F.; Santos, E.; Schmickler, W., Volcano plots in hydrogen electrocatalysis - uses and abuses. *Beilstein J Nanotechnol* **2014**, *5*, 846-854.
